# Supplementary material for: The Re-Identification of Previously Unidentifiable Clinical Non-Tuberculous Mycobacterial Isolates Shows Great Species Diversity and the Presence of Other Acid-Fast Genera
Source: MDPI journal article supplement (doi:10.3390/pathogens11101159), 2022-10-07
Supplement: s1 [file s1]

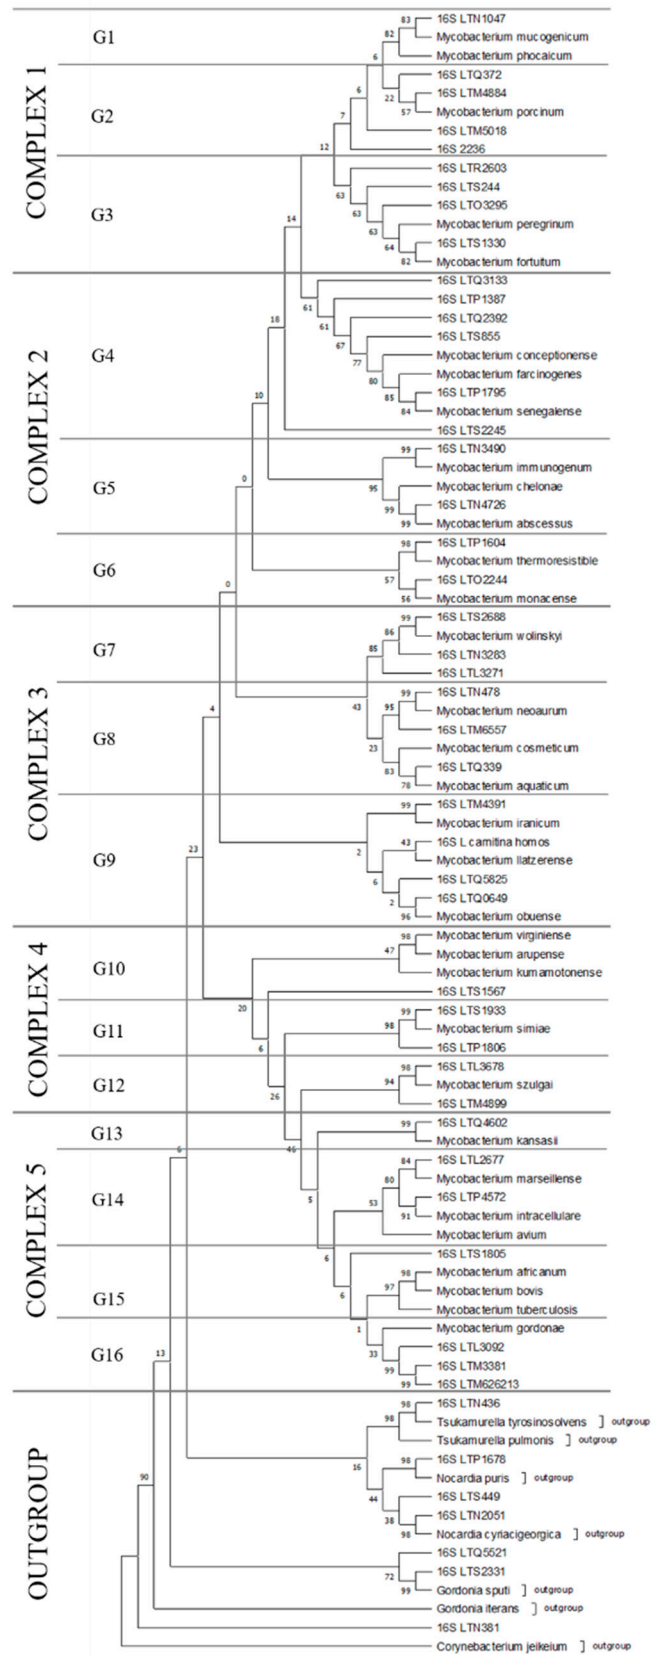

**Figure S1.** Phylogenetic tree of 16S rRNA sequences of the mycobacterium reference sequences, outgroup strains and the *Mycobacterium* spp. strains from this study.

**Table S1.** Origin and identification of acid-fast bacteria, identified as *Mycobacteria* with the ZN staining. Shown are the identification with PRA, and identification with BLAST with the sequence of the 16S gene. The strains LTR2603, LTS244, LTO3295, and LTN4726 were identified with the *hsp65* sequence, and the strains LTP1387, LTQ2392, and LTS855 with the *rpoB* sequences. The final column is the species identification based on a phylogenetic analysis.

|               | Group<br>s    | Code <sup>a</sup> | Year <sup>b</sup> | Age  | Sex | Sample<br>Type <sup>c</sup>                    | Pre-<br>identificati<br>on with<br>PRA <sup>d</sup> | Blast<br>Identification:<br>16S, rpoB<br>and/or Hsp65<br>Sequence                                                                           | Species<br>identification by<br>phylogenetic<br>Analysis                                                                                    |
|---------------|---------------|-------------------|-------------------|------|-----|------------------------------------------------|-----------------------------------------------------|---------------------------------------------------------------------------------------------------------------------------------------------|---------------------------------------------------------------------------------------------------------------------------------------------|
| COMPLE<br>X 1 | G1            | LTN1047           | 2016              | 39   | F   | Secretion                                      | <i>M. spp.</i>                                      | <i>M. mucogenicum</i>                                                                                                                       | <i>M. mucogenicum</i> and<br><i>phocaicum</i> <sup>e</sup>                                                                                  |
|               | G2            | LTQ372            | 2019              | 28   | F   | NA <sup>f</sup>                                | <i>M. abscessus</i>                                 | <i>M. phocaicum</i>                                                                                                                         | <i>M. porcinum</i> <sup>e</sup>                                                                                                             |
|               |               | LTM488<br>4       | 2015              | NA   | F   | NA                                             | <i>M. spp.</i>                                      | <i>M. porcinum</i> / <i>M.<br/>fortuitum</i>                                                                                                | <i>M. porcinum</i>                                                                                                                          |
|               |               | LTM501<br>8       | 2015              | 86   | M   | Sputum                                         | <i>M. spp.</i>                                      | <i>M. phocaicum</i> / <i>M.<br/>mucogenicum</i>                                                                                             | <i>M. porcinum</i>                                                                                                                          |
|               |               | LTN2236           | NA                | NA   | NA  | Tap<br>water<br>medical<br>consultin<br>g room | <i>M. spp.</i>                                      | <i>M. phocaicum</i> / <i>M.<br/>mucogenicum</i>                                                                                             | <i>M. porcinum</i>                                                                                                                          |
|               |               |                   | LTR2603           | 2021 | 74  | M                                              | Secretion                                           | <i>M.<br/>tuberculosis</i> /<br><i>M. fortuitum</i>                                                                                         | <i>M. fortuitum</i> / <i>M.<br/>spp.</i> / <i>M. gilvum</i>                                                                                 |
|               | G3            | LTS244            | 2018              | 70   | M   | Secretion                                      | <i>M.<br/>tuberculosis</i> /<br><i>M. fortuitum</i> | <i>M. fortuitum</i> <i>M.<br/>fortuitum</i> / <i>M.<br/>spp.</i> / <i>M. gilvum</i>                                                         | <i>M. fortuitum</i>                                                                                                                         |
|               |               | LTO3295           | 2017              | 45   | F   | Sputum                                         | <i>M. spp.</i>                                      | <i>M. fortuitum</i> <i>M.<br/>fortuitum</i> / <i>M.<br/>spp.</i> / <i>M. gilvum</i>                                                         | <i>M. fortuitum</i>                                                                                                                         |
|               |               | LTS1330           | 2021              | 63   | F   | Sputum                                         | NA                                                  | <i>M. fortuitum</i> <i>M.<br/>fortuitum</i> / <i>M.<br/>spp.</i> / <i>M. gilvum</i>                                                         | <i>M. fortuitum</i>                                                                                                                         |
|               | COMPLE<br>X 2 | G4                | LTQ3133           | 2019 | 42  | M                                              | Biopsy                                              | <i>M.<br/>peregrinum</i>                                                                                                                    | <i>M.<br/>senegalense</i> / <i>M.<br/>conceptionense</i> / <i>M.<br/>farcinogenes</i> / <i>M.<br/>houstonense</i> / <i>M.<br/>fortuitum</i> |
| LTP1387       |               |                   | 2018              | 62   | F   | Pleural<br>fluid                               | <i>M. spp.</i>                                      | <i>M.<br/>senegalense</i> / <i>M.<br/>conceptionense</i> / <i>M.<br/>farcinogenes</i> / <i>M.<br/>houstonense</i> / <i>M.<br/>fortuitum</i> | <i>M. senegalense</i> and<br><i>farcinogenes</i> <sup>e</sup>                                                                               |
| LTQ2392       |               |                   | 2019              | 24   | F   | Secretion                                      | <i>M.<br/>peregrinum</i>                            | <i>M.<br/>senegalense</i> / <i>M.<br/>conceptionense</i> / <i>M.<br/>farcinogenes</i> / <i>M.</i>                                           | <i>M. conceptionense</i>                                                                                                                    |

|           |    |             |      |    |   |               |                                              |                                                                                                                                                                                                |
|-----------|----|-------------|------|----|---|---------------|----------------------------------------------|------------------------------------------------------------------------------------------------------------------------------------------------------------------------------------------------|
| COMPLEX 3 |    |             |      |    |   |               | <i>houstonense</i> / <i>M. fortuitum</i>     |                                                                                                                                                                                                |
|           |    | LTS855      | 2021 | 19 | F | Sputum        | <i>M. tuberculosis</i> / <i>M. fortuitum</i> | <i>M. senegalense</i> / <i>M. conceptionense</i> / <i>M. farcinogenes</i> / <i>M. houstonense</i> / <i>M. fortuitum</i><br><i>M. conceptionense</i>                                            |
|           |    | LTP1795     | 2018 | 41 | F | Secretion     | <i>M. spp.</i>                               | <i>M. senegalense</i> / <i>M. conceptionense</i> / <i>M. farcinogenes</i> / <i>M. houstonense</i> / <i>M. fortuitum</i><br><i>M. conceptionense, senegalense and farcinogenes</i> <sup>e</sup> |
|           | G5 | LTS2245     | 2021 | 68 | M | Sputum        | <i>M. spp.</i>                               | <i>M. senegalense</i> / <i>M. conceptionense</i> / <i>M. farcinogenes</i> / <i>M. houstonense</i> / <i>M. fortuitum</i><br><i>M. conceptionense, senegalense and farcinogenes</i> <sup>e</sup> |
|           |    | LTN3490     | 2016 | 60 | M | NA            | <i>M. spp.</i>                               | <i>M. immunogenum</i> / <i>M. chelonae</i> / <i>M. spp.</i><br><i>M. immunogenum abscessus and chelonae</i> <sup>e</sup>                                                                       |
|           |    | LTN4726     | 2016 | 17 | M | Biopsy        | <i>M. spp.</i>                               | <i>M. chelonae</i> / <i>M. abscessus</i><br><i>M. abscessus</i>                                                                                                                                |
|           | G6 | LTP1604     | 2018 | 58 | M | Pleural fluid | <i>M. spp.</i>                               | <i>M. thermoresistibile</i> / <i>M. spp.</i><br><i>M. thermoresistibile</i>                                                                                                                    |
|           |    | LTO2244     | 2017 | 45 | F | Sputum        | <i>M. spp.</i>                               | <i>N. cyriacigeorgica</i> / <i>M. vanbaalenii</i><br>Non-identifiable                                                                                                                          |
|           | G7 | LTS2688     | 2021 | 8  | M | Pleural fluid | NA                                           | <i>M. wolinskyi</i> / <i>M. jacuzzii</i><br><i>M. wolinskyi</i>                                                                                                                                |
|           |    | LTN3283     | 2016 | -  | - | Sauce         | <i>M. goodii</i> / <i>M. smegmatis</i>       | <i>M. wolinskyi</i> / <i>M. jacuzzii</i><br><i>M. wolinskyi</i>                                                                                                                                |
|           |    | LTL3271     | 2014 | 27 | F | Secretion     | <i>M. spp.</i>                               | <i>M. jacuzzii</i> / <i>M. peregrinum</i> / <i>M. spp.</i><br><i>M. wolinskyi</i>                                                                                                              |
|           | G8 | LTN478      | 2016 | 43 | F | Sputum        | <i>M. spp.</i>                               | <i>M. bacteremicum</i> / <i>M. neoaurum</i> / <i>M. spp.</i><br><i>M. neoaurum</i>                                                                                                             |
|           |    | LTM655<br>7 | 2015 | 77 | F | Sputum        | <i>N. spp.</i> / <i>M. neonarum</i>          | <i>M. bacteremicum</i> / <i>M. neonarum</i><br><i>M. neoaurum</i>                                                                                                                              |
|           |    | LTQ339      | 2019 | 19 | M | Pleural fluid | <i>M. spp.</i>                               | <i>M. cosmeticum</i> / <i>M. spp.</i> / <i>M. wolinskyi</i><br><i>M. cosmeticum</i>                                                                                                            |

|               |                 |             |      |    |                     |                            |                                                                                      |                                                                                                 |                                                                                  |
|---------------|-----------------|-------------|------|----|---------------------|----------------------------|--------------------------------------------------------------------------------------|-------------------------------------------------------------------------------------------------|----------------------------------------------------------------------------------|
| G9            | LTM439<br>1     | 2015        | 40   | M  | Secretion           | <i>M. spp.</i>             | <i>M. iranicum</i> / <i>M. spp.</i>                                                  | <i>M. iranicum</i>                                                                              |                                                                                  |
|               | L-<br>carnitine | NA          | -    | -  | Cosmetic<br>product | <i>M. mucogenicu<br/>m</i> | <i>M. mucogenicum</i> / <i>M. phocaicum</i> / <i>M. spp.</i>                         | <i>M. llatzerense</i>                                                                           |                                                                                  |
|               | LTQ5825         | 2019        | 48   | F  | Secretion           | <i>N. spp.</i>             | <i>M. mucogenicum</i> / <i>M. phocaicum</i> / <i>M. spp.</i> / <i>M. Llatzerense</i> | <i>M. llatzerense</i> <sup>e</sup>                                                              |                                                                                  |
|               | LTQ0649         | 2019        | 30   | F  | Pleural<br>fluid    | <i>Actinomiceta<br/>e</i>  | <i>M. obuense</i> / <i>M. spp.</i> / <i>M. kyogaense</i>                             | <i>M. obuense</i>                                                                               |                                                                                  |
|               |                 |             |      |    |                     |                            |                                                                                      |                                                                                                 |                                                                                  |
| COMPLE<br>X 4 | G10             | LTS1567     | 2021 | 63 | F                   | Sputum                     | NA                                                                                   | <i>M. crocinum</i> / <i>M. spp.</i> / <i>M. gilvum</i> / <i>M. chitae</i> / <i>M. aquaticum</i> | Non-identifiable                                                                 |
|               | G11             | LTS1933     | 2021 | 63 | F                   | Sputum                     | NA                                                                                   | <i>M. simiae</i>                                                                                | <i>M. simiae</i>                                                                 |
|               |                 | LTP1806     | 2018 | 65 | F                   | Pleural<br>fluid           | <i>M. spp.</i>                                                                       | <i>M. simiae</i>                                                                                | <i>M. simiae</i>                                                                 |
|               | G12             | LTL3678     | 2014 | 26 | M                   | Sputum                     | <i>N. spp.</i>                                                                       | <i>M. szulgai</i> / <i>M. angelicum</i>                                                         | <i>M. szulgai</i>                                                                |
|               |                 | LTM489<br>9 | 2015 | 79 | M                   | Pleural<br>fluid           | <i>N. spp.</i>                                                                       | <i>M. szulgai</i> / <i>M. angelicum</i> / <i>M. spp.</i>                                        | <i>M. szulgai</i>                                                                |
| COMPLE<br>X 5 | G13             | LTQ4602     | 2019 | 66 | M                   | Sputum                     | NA                                                                                   | <i>M. kansasii</i> / <i>M. gastri</i> / <i>M. ostraviense</i>                                   | <i>M. kansasii</i>                                                               |
|               | G14             | LTL2677     | 2014 | 59 | F                   | Sputum                     | <i>M. spp.</i>                                                                       | <i>M. marseillense</i> / <i>M. yongonense</i> / <i>M. intracellulare</i>                        | <i>M. marseillense</i> ,<br><i>intracellulare</i> y <i>avium</i><br><sup>e</sup> |
|               |                 | LTP4572     | 2018 | 76 | M                   | Sputum                     | <i>M. chimaera</i>                                                                   | <i>M. paraintracellulare</i> / <i>M. intracellulare</i> subspp. <i>chimaera</i>                 | <i>M. marseillense</i> ,<br><i>intracellulare</i> y <i>avium</i><br><sup>e</sup> |
|               | G15             | LTS1805     | 2021 | 58 | F                   | Secretion                  | NA                                                                                   | <i>M. ulcerans</i> / <i>M. marinum</i>                                                          | Non-identifiable                                                                 |
|               | G16             | LTL3092     | 2014 | 24 | F                   | Biopsy                     | <i>N. spp.</i>                                                                       | <i>C. jeikeium</i> / <i>C. amycolatum</i>                                                       | Non-identifiable                                                                 |
|               |                 | LTM338<br>1 | 2015 | 61 | F                   | Urine                      | <i>N. spp.</i>                                                                       | <i>C. jeikeium</i>                                                                              | Non-identifiable                                                                 |
|               |                 | LTM621<br>3 | 2015 | 82 | F                   | Sputum                     | <i>M. chimaera</i> / <i>M. intracellulare</i>                                        | <i>C. jeikeium</i> / <i>C. amycolatum</i>                                                       | Non-identifiable                                                                 |
|               | Outgr<br>oup    | LTN436      | 2016 | 43 | F                   | Sputum                     | <i>M. spp.</i>                                                                       | <i>T. pulmonics</i> / <i>T. conjunctivitis</i>                                                  | <i>T. pulmonis</i>                                                               |

|         |      |    |   |               |                                 |                                                                         |                                        |
|---------|------|----|---|---------------|---------------------------------|-------------------------------------------------------------------------|----------------------------------------|
| LTP1678 | 2018 | 70 | F | Sputum        | <i>Actinomiceta</i><br><i>e</i> | <i>N. puris</i> / <i>N. spp.</i>                                        | <i>N. puris</i>                        |
| LTS449  | 2021 | 62 | F | Secretion     | <i>N. spp.</i>                  | <i>N. niwae</i> / <i>N. beijingensis</i>                                | <i>N. cyriacigeorgica</i> <sup>e</sup> |
| LTN2051 | 2016 | -  | M | Sputum        | <i>M. spp.</i>                  | <i>N. cyriacigeorgica</i> / <i>N. spp.</i>                              | <i>N. cyriacigeorgica</i>              |
| LTQ5521 | 2019 | 29 | M | Pleural fluid | <i>M. abscessus</i>             | <i>G. bronchialis</i> / <i>G. spp.</i> / <i>Actinomycetia bacterium</i> | Non-identifiable                       |
| LTS2331 | 2021 | 30 | M | Sputum        | <i>N. spp.</i>                  | <i>G. sputi</i> / <i>G. spp.</i>                                        | <i>G. sputi</i>                        |
| LTN381  | 2016 | 64 | M | Pleural fluid | <i>M. spp.</i>                  | <i>Clostridium perfringens</i>                                          | Non-identifiable                       |

<sup>a</sup> Laboratory code Caracas; <sup>b</sup>Year of isolation; <sup>c</sup>Type of clinical sample; <sup>d</sup>Pre-identification by PRA;

<sup>e</sup>Near (NR);

NA = not available. These are patients' samples but unknown is the type of clinical sample.

Genera: M.: *Mycobacterium*, N\*: *Nocardia*, T\*: *Tsukamurella*, G\*: *Gordonia*; C\*: *Corynebacterium*. For strains LTM4391, LTM6213, LTN3490, LTL3092 and LTQ5825, indicated in bold red in the table, no PCR product for the hsp65 PCR was obtained.

**Table S2.** GenBank accession numbers of *Mycobacterium* species sequences used in the phylogenetic analysis.

| <i>Mycobacterium</i> Species      | ID Genbank |             |              |
|-----------------------------------|------------|-------------|--------------|
|                                   | 16S        | <i>rpoB</i> | <i>hsp65</i> |
| <i>M. bovis</i>                   | AF547903   | AF057451    | AF547813     |
| <i>M. africanum</i>               | AF547893   | JF923622    | AF547803     |
| <i>M. tuberculosis</i>            | X52917     | L27989      | AY299144     |
| <i>M. avium</i> Sub. <i>Avium</i> | AJ536037   | -           | -            |
| <i>M. abscessus</i>               | AY457071   | AY262741    | AY458075     |
| <i>M. cosmeticum</i>              | AY449728   | DQ124109    | AY449730     |
| <i>M. fortuitum</i>               | AY457066   | AY147165    | AY458072     |
| <i>M. wolinskyi</i>               | AY457083   | -           | -            |
| <i>M. obuense</i>                 | X55597     | AY544951    | -            |
| <i>M. arupense</i>                | DQ157760   | JN571215    | EU191917     |
| <i>M. monacense</i>               | AF107039   | EU191923    | JF491320     |
| <i>M. neoaurum</i>                | AF480593   | JF712875    | AF547860     |
| <i>M. gordonae</i>                | X52923     | AY544919    | AF547840     |
| <i>M. mucogenicum</i>             | AY457074   | AY147171    | AY458078     |
| <i>M. szulgai</i>                 | X52926     | AY544966    | AF547878     |
| <i>M. phocaicum</i>               | AY859682   | AY859693    | DQ987726     |
| <i>M. kansasii</i>                | AJ536035   | KY933079    | AF547849     |
| <i>M. conceptionense</i>          | AY859684   | AY859695    | AM902957     |
| <i>M. senegalense</i>             | AY457081   | AY262738    | AY458067     |
| <i>M. virginiae</i>               | KR025879   | KR025893    | MK587449     |
| <i>M. kumamotoense</i>            | JN571176   | JN571253    | AB239920     |
| <i>M. thermoresistibile</i>       | X55602     | AY544968    | -            |
| <i>M. marseillense</i>            | EU266632   | EF584444    | EU239788     |
| <i>M. intracellulare</i>          | AJ536036   | JQ411539    | AF547848     |
| <i>M. iranica</i>                 | HQ009482   | -           | -            |
| <i>M. farcinogenes</i>            | AY457084   | AY262742    | AF547830     |
| <i>M. porcinum</i>                | AF480588   | AY544955    | AF547867     |
| <i>M. peregrinum</i>              | AF547956   | AY147166    | AY458069     |

|                                     |          |          |          |
|-------------------------------------|----------|----------|----------|
| <i>M. chelonae</i>                  | AF547909 | AY147163 | JX154110 |
| <i>M. simiae</i>                    | AF547966 | AY544963 | AF547875 |
| <i>M. aquaticum</i>                 | KY392537 | -        | -        |
| <i>M. llatzerense</i>               | AJ746070 | -        | -        |
| <i>M. immunogenum</i>               | HE654001 | -        | -        |
| <i>Nocardia puris</i>               | AJ508748 | DQ08514  | AY903632 |
| <i>Nocardia cyriacigeorgica</i>     | KP137526 | DQ085116 | AY756522 |
| <i>Tsukamurella pulmonis</i>        | X92981   | KX932012 | -        |
| <i>Tsukamurella tyrosinosolvens</i> | Y12248   | KX932015 | -        |
| <i>Corynebacterium jeikeium</i>     | AB470615 | AY492231 | -        |
| <i>Gordonia iterans</i>             | AB624257 | -        | -        |
| <i>Gordonia sputi</i>               | X81923   | -        | -        |

**Table S3.** DNA Models test, divergence percentages, and number of identifications for each gene.

| Gene         | Model                 | Outgroup | Ingroup | % DIVERGENCE |         | Identifications |
|--------------|-----------------------|----------|---------|--------------|---------|-----------------|
|              |                       |          |         | Between      | Overall |                 |
| <b>16S</b>   | T92 <sup>a</sup> +G+I | 2.99E+05 | 1.328   | 1-9          | 4.631   | 22              |
| <i>rpoB</i>  | GTR <sup>b</sup> +G+I | -        | 5.068   | 5.75-13.61   | 9.232   | 2               |
| <i>hsp65</i> | GTR+G+I               | -        | 3.606   | 2.32-12.48   | 8.288   | 5               |

<sup>a</sup>:Tamura 3-parameter is the estimation of the number of nucleotide substitutions when there are strong transition-transversion and G + C-content biases; <sup>b</sup>: General Time Reversible gives nucleotides consisting of parameters of an equilibrium base frequency vector, where frequency at each base occurred at this site and rate matrix.

**Table S4.** 16S rRNA sequences of the 48 strains that were identified with ZN staining as belonging to the genus *Mycobacteria*.

| #Accession | Sequence ID      |
|------------|------------------|
| ON171319   | Mycobacterium1   |
| ON171320   | Mycobacterium2   |
| ON171321   | Mycobacterium3   |
| ON171322   | Nocardia4        |
| ON171323   | Corynebacterium5 |
| ON171324   | Mycobacterium6   |
| ON171325   | Gordonia7        |
| ON171326   | Mycobacterium8   |
| ON171327   | Mycobacterium9   |
| ON171328   | Mycobacterium10  |
| ON171329   | Mycobacterium11  |
| ON171330   | Tsukamurella12   |
| ON171331   | Mycobacterium13  |
| ON171332   | Nocardia14       |
| ON171333   | Mycobacterium15  |
| ON171334   | Mycobacterium16  |
| ON171335   | Mycobacterium17  |
| ON171336   | Gordonia18       |
| ON171337   | Mycobacterium19  |
| ON171338   | Mycobacterium20  |
| ON171339   | Mycobacterium21  |
| ON171340   | Mycobacterium22  |
| ON171341   | Mycobacterium23  |

|          |                   |
|----------|-------------------|
| ON171342 | Mycobacterium24   |
| ON171343 | Mycobacterium25   |
| ON171344 | Corynebacterium26 |
| ON171345 | Mycobacterium27   |
| ON171346 | Mycobacterium28   |
| ON171347 | Clostridium29     |
| ON171348 | Mycobacterium30   |
| ON171349 | Mycobacterium31   |
| ON171350 | Mycobacterium32   |
| ON171351 | Mycobacterium33   |
| ON171352 | Mycobacterium34   |
| ON171353 | Mycobacterium35   |
| ON171354 | Mycobacterium36   |
| ON171355 | Nocardia37        |
| ON171356 | Mycobacterium38   |
| ON171357 | Mycobacterium39   |
| ON171358 | Corynebacterium40 |
| ON171359 | Mycobacterium41   |
| ON171360 | Mycobacterium42   |
| ON171361 | Mycobacterium43   |
| ON171362 | Mycobacterium44   |
| ON171363 | Mycobacterium45   |
| ON171364 | Mycobacterium46   |
| ON171365 | Mycobacterium47   |
| ON171366 | Mycobacterium48   |
